# Supplementary material
Source: publisher figshare collection journal article supplement (https://frontiersin.figshare.com/ndownloader/files/31625132)

A

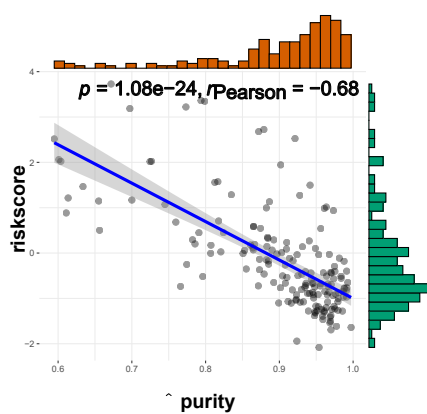

B

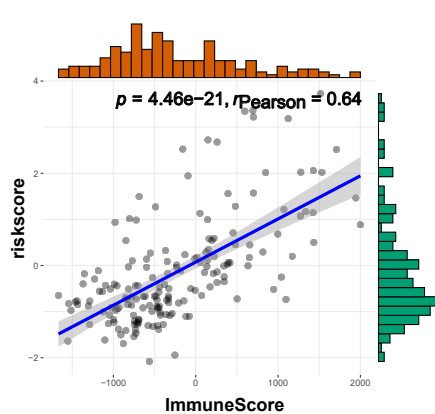

C

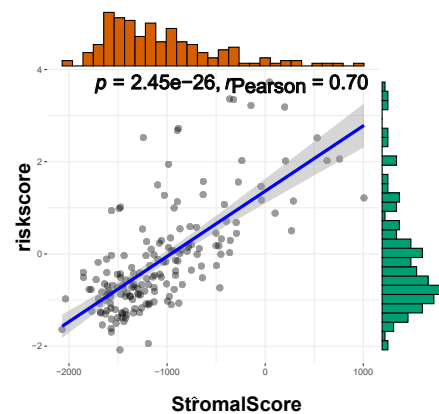

D

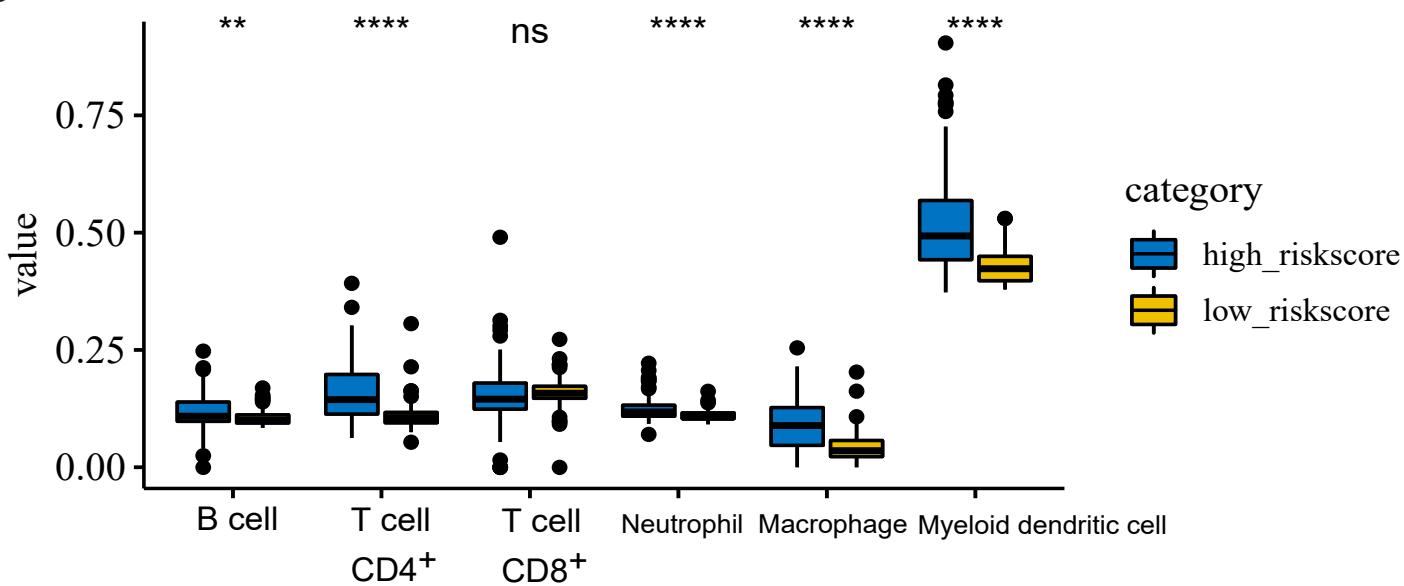

E

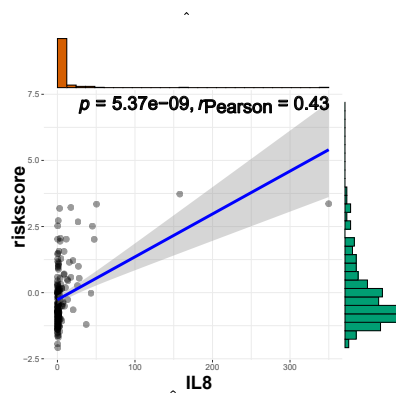

Supplement: Supplementary file [file 31625132]
